# Supplementary material
Source: Springer Nature journal article supplement (https://www.springermedizin.de/resource/supplementary/12950_2007_64_MOESM10_ESM.pdf/9557930)

# Figure 5 (Choice 2b)

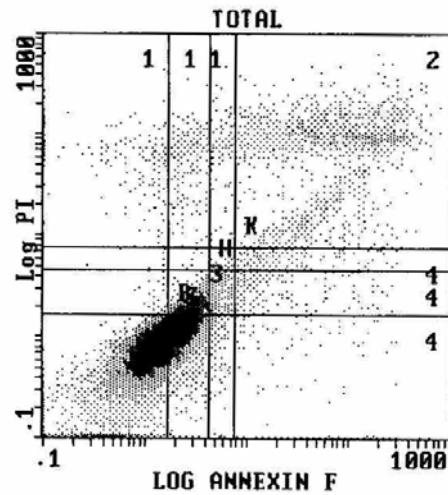

10  $\mu$ M FTI

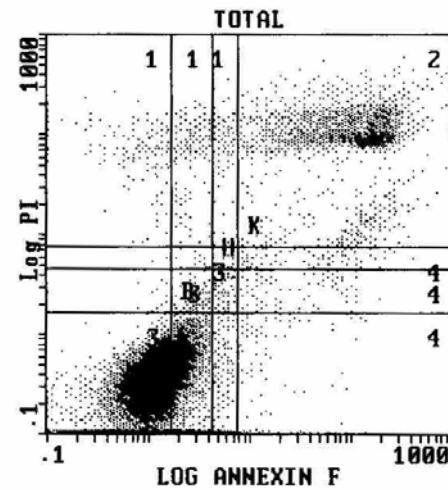

Control

Supplement: MOESM10 [file 9557930]
